# Supplementary material for: A hierarchical porous architecture of silicon@TiO2@carbon composite novel anode materials for high performance Li-ion batteries
Source: Royal Society of Chemistry journal article supplement (doi:10.1039/c9nj03708j), 2019-01-01
Supplement: c9nj03708j1.pdf [file c9nj03708j1.pdf]

New Journal of Chemistry (RSC)  
Electronic Supplementary Information

**A hierarchical porous of silicon@TiO<sub>2</sub>@carbon composite novel  
anode materials for high performance li-ion battery**

Qiliang Pan<sup>a,b</sup>, Jianguo Zhao<sup>a,b,\*</sup>, Baoyan Xing<sup>a,b</sup>, Shang Jiang<sup>b</sup>, Wenshan Qu<sup>b</sup>, Shanshan Zhang<sup>b</sup>, Yichan Zhang<sup>b</sup>,  
Lu zhao<sup>b</sup>, Wei Liang<sup>a,\*</sup>

(a. College of Materials Science and Engineering, Taiyuan University of Technology, Taiyuan, Shanxi province  
030024, China; b. Institute of Carbon Materials Science, Shanxi DaTong University, DaTong, Shanxi province  
037009; China)

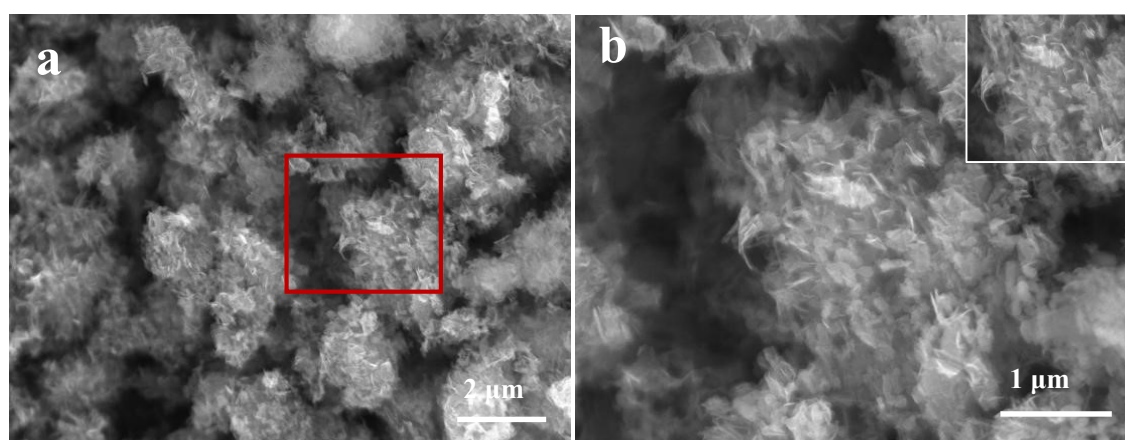

Fig. S1 SEM images of the Si@TiO<sub>2</sub> composite

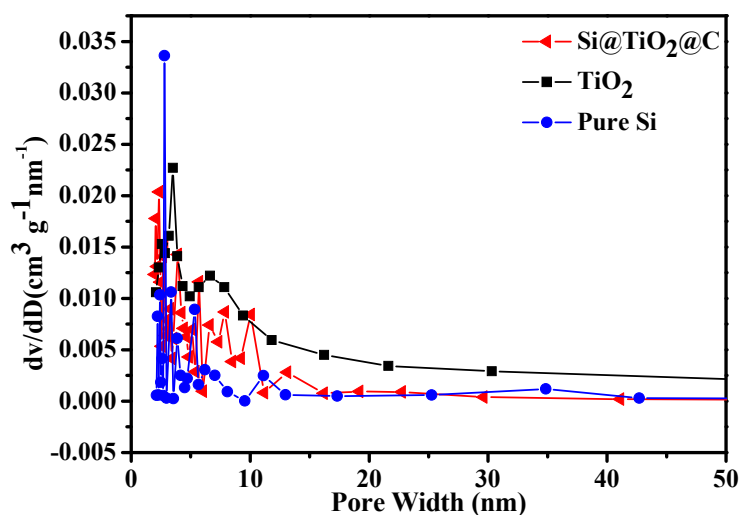

Fig. S2. The relevant pore diameter scatter diagrams of TiO<sub>2</sub>, pure Si and Si@TiO<sub>2</sub>@C composite

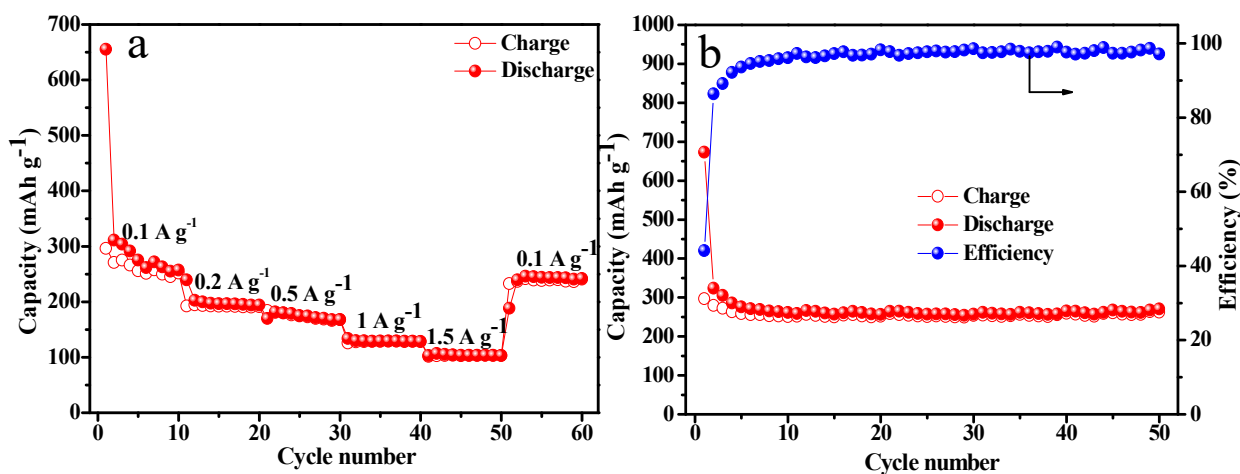

Fig. S3 (a) Rate performance of  $\text{TiO}_2$  electrodes at various current density. (b) The cycle performance and CE of  $\text{TiO}_2$ .

The specific capacity of pure  $\text{TiO}_2$  electrodes is  $296.4$  and  $655.5 \text{mAh g}^{-1}$  in initial charge and discharge at  $100 \text{mA g}^{-1}$ , respectively. The CE value of the pure  $\text{TiO}_2$  is  $45.2\%$ . The specific capacity of the pure  $\text{TiO}_2$  maintains  $262.4$  and  $270.2 \text{mAh g}^{-1}$  after 50 cycles at  $100 \text{mA g}^{-1}$ , respectively. The CE value is  $97.1\%$ . Compared with pure  $\text{TiO}_2$ , the properties of the  $\text{Si@TiO}_2@\text{C}$  composite materials are obviously superior.

Table S1 Equivalent circuit parameters derived using equivalent circuit model

| Electrodes | Pure Si | $\text{Si@TiO}_2$ | $\text{Si@TiO}_2@\text{C}$ |
|------------|---------|-------------------|----------------------------|
| $R_e$      | 6.98    | 4.695             | 2.535                      |
| $R_{ct}$   | 122.6   | 99.69             | 27.96                      |
